# Supplementary material
Source: Springer Nature journal article supplement (https://www.springermedizin.de/resource/supplementary/13046_2013_764_MOESM4_ESM.pdf/9662896)

**A**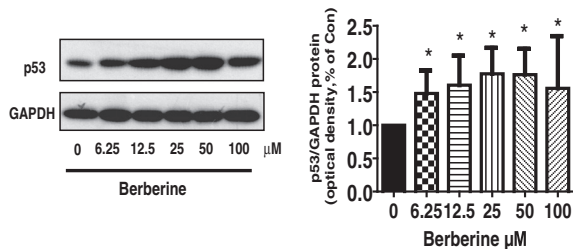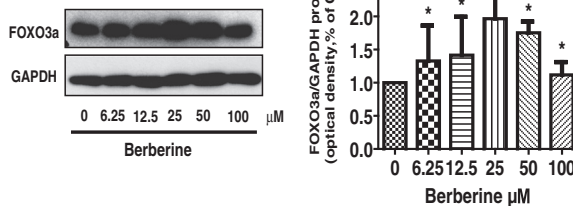**B**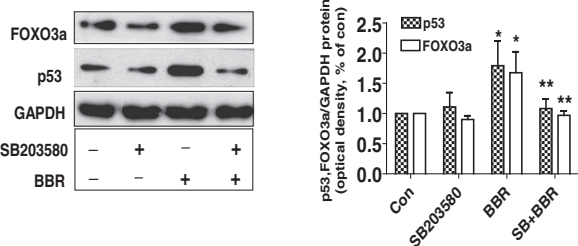**C**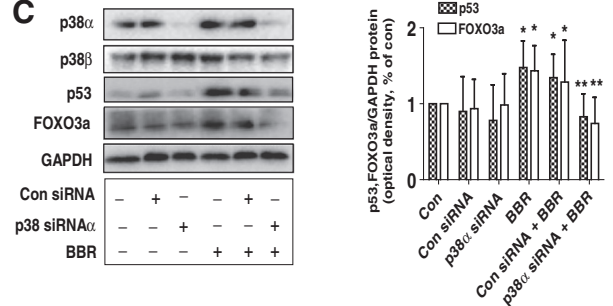**D**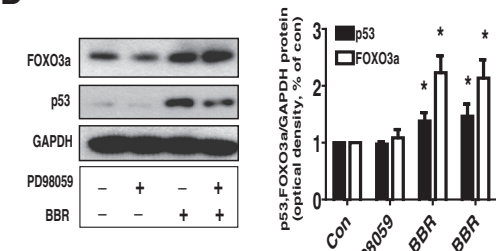**E**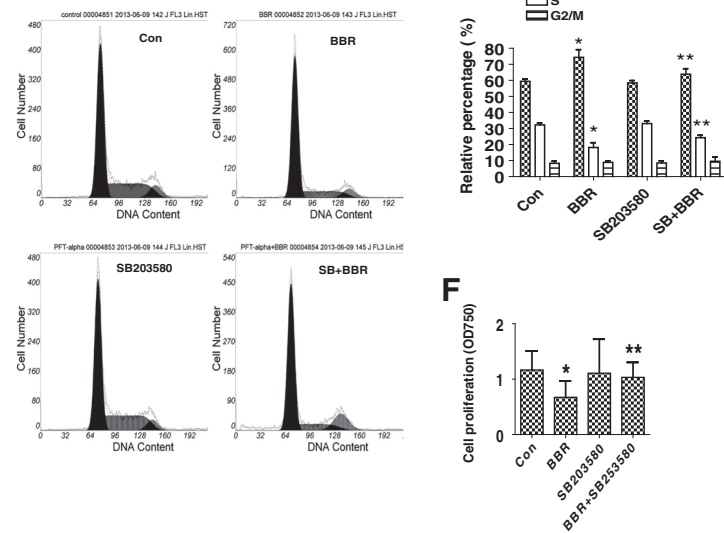**F**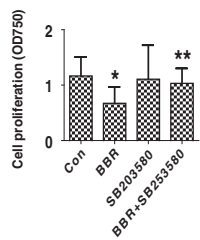

Supplement: MOESM4 [file 9662896]
